## CORRECTION

# Correction: Thermal performance curves for aerobic scope in a tropical fish (*Lates calcarifer*): flexible in amplitude but not breadth

Hanna Scheuffele, Francesc Rubio-Gracia and Timothy D. Clark

There was an error in *J. Exp. Biol.* (2021) **224**, jeb243504 (doi:10.1242/jeb.243504).

The units for oxygen consumption rate ( $\dot{M}_{O_2}$ ) were incorrectly given as  $\text{mg O}_2 \text{ h}^{-1} 65.72 \text{ g}^{-1}$ , whereas they should be listed as  $\text{mg O}_2 \text{ min}^{-1} 65.72 \text{ g}^{-1}$ . This applies to calculations of standard metabolic rate, maximum metabolic rate and absolute aerobic scope throughout most of the paper (including in the Results and figure axes). Both the online full-text and PDF versions of the paper have been corrected. The associated figshare files have also been updated (<https://doi.org/10.6084/m9.figshare.16624978>).

The authors apologise to readers for any inconvenience caused by this error.
